# Supplementary material for: ZSM-5/γ-Al2O3 Catalysts for Methanol Dehydration: Tuning Pore Structure by Carbon Nanotubes as a Pore-Forming Agent
Source: Hindawi journal article supplement (doi:10.1155/2023/6629794), 2023-12-27
Supplement: f1 [file 6629794.f1.docx]

ZSM-5/γ-Al2O3 catalysts for methanol dehydration: tuning pore structure by carbon nanotubes as a pore-forming agent

Supplemental information

Reaction order evaluation

Kinetic experiments were performed to evaluate the reaction order. A set of 5 different methanol concentrations were tested at 150°C. ln C – ln r plots are shown below.

Figure.S1 ln – ln r plots for studied catalysts, where r is reaction rate, mol/(s*g)

Linear fitting gives reaction order values 0,9 for ZA-1 and 0,7 for ZA-2.

Table.S1 Diffusion limitations criteria for described conditions

|  | ZA-1 | | ZA-2 | |
| --- | --- | --- | --- | --- |
|  | Ca |  | Ca |  |
| 35:35 | 0,00053 | 0,05300 | 0,00018 | 0,01910 |
| 40:30 | 0,00063 | 0,06300 | 0,00017 | 0,01720 |
| 45:25 | 0,00076 | 0,00048 | 0,0002 | 0,00052 |
| 50:20 | 0,00064 | 0,00041 | 0,00021 | 0,00054 |
| 55:15 | 0,00069 | 0,00043 | 0,00042 | 0,00011 |

External diffusion limitations

If the process rate is limited by the external diffusion of the reagent, the reaction is of the first order toward reagent irrespectively to the expression of the intrinsic reaction rate. There are several criteria concerning the effect of the external mass transfer limitations on the overall process rate, e.g. **Carberry number** (*Ca*). The latter is defined by:

Where:

*robs* – observed rate of the reaction, mol/s;

*F* – external surface area of the catalyst particles, m2;

*Ci* – reagent concentration, mol/m3;

*kf* – mass transfer coefficient, m/s. The mass transfer coefficient is given by:

Here:

*dp* – mean particle diameter, m;

*D* – diffusion coefficient of the reactant, m2/s;

*Sh* – Sherwood number.

In the experimental scenario studied, the mean particle diameter is *dp* = 5×10-4 m. Particle densities of the catalysts are *ρ* = 616 kg/m3 and *ρ* = 864 kg/m3 for ZA-1 and ZA-2, respectively. Bulk density is approximately similar for both samples: *ρH* = 500 kg/m3. Consider the vapor phase containing 36% (vol. %) of methanol and 64% (vol. %) of argon. The dynamic viscosity of the vapor mixture at a given temperature is calculated under the following formula:

Where *Фij* is expressed as follows:

Where

*M* – molar mass of the relevant component, kg/mol;

*μ* – viscosity of the component, Pa×s.

Viscosities of the individual components in polynomial form were taken from [1].

Table S2. values

| T,°C |  |
| --- | --- |
| 150 | 1,34 |
| 180 | 1,33 |
| 210 | 1,31 |
| 240 | 1,30 |
| 270 | 1,29 |

150°C: = 1,97 *

180°C: = 2,25 *

210°C: = 2,37 *

240°C: = 2,50*

270°C: = 2,62 *

Viscosity of the mixture (m2/s) is given by:

Density of a gas mixture is:

Table S3. Density of a mixture at different temperatures

| T,°C | , kg/m3 |
| --- | --- |
| 150 | 1,070 |
| 180 | 0,999 |
| 210 | 0,937 |
| 240 | 0,883 |
| 270 | 0,833 |

At 150 °C: Pa*s

At 180 °C: Pa*s

At 210 °C: Pa*s

At 240 °C: Pa*s

At 270 °C: Pa*s

Reynolds number (*Re*) was calculated under the following formula:

Where:

*w0* – gas flow rate in the channels between the catalyst particles, m/s;

*d0* – equivalent diameter of the channels between the catalyst particles, m. The relevant diameter is defined by:

*ε* – porosity of the catalyst. The latter is evaluated as follows:

Thereafter, porosity of the ZA-1 is , whereas the porosity of the ZA-2 sample equals .

For the ZA-1, equivalent diameter of the channels between the catalyst particles is m.

For ZA-2 , equivalent diameter of the channels between the catalyst particles is m.

*w0* is calculated as follows. At normal temperature and pressure, the total feed flow rate is 70 cm3/min. At temperature T, the total feed flow is cm3/min or /s. The cross-section area of the reactor is m2. The linear feed flow rate in an empty reactor *ω* is m/s.

*w0* itself is given by an equation:

Table S4. Calculated values of

| T,°C |  |  |
| --- | --- | --- |
| 150 | 0,088 | 0,039 |
| 180 | 0,095 | 0,042 |
| 210 | 0,100 | 0,045 |
| 240 |  |  |
| 270 |  | 0 |

With the knowledge about *w0* and *d0* Reynolds number may be evaluated.

For the ZA-1:

150 °C: .

180 °C: .

210 °C: .

240 °C: .

270 °C: .

For the ZA-2:

150 °C:

180 °C:

210 °C:

240 °C:

270 °C: .

Schmidt number (*Sc*) is defined by:

Where *Db* is the bulk diffusivity, m2/s. The latter is given by:

Where

*ϑ* – mean velocity of the methanol molecules, m/s;

*λ* – mean free path of the methanol molecules, m.

*ϑ* is estimated as follows:

The mean free path is given by:

Where:

*kB* – Boltzmann constant (1,38×10-23 J/K);

*σ* – methanol molecular radius (3,626×10-10 m);

*P* – total pressure, Pa.

The mean free path is: m.

Table S5. Values of and at different temperatures

| T,°C | , m/s | , m |
| --- | --- | --- |
| 150 | 529 | 0,99 |
| 180 | 548 | 1,06 |
| 210 | 565 | 1,13 |
| 240 | 583 | 1,20 |
| 270 | 599 | 1,27 |

To this end, bulk diffusivity equals

At 150°C: m2/s.

At 180°C: m2/s.

At 210°C: m2/s.

At 240°C: m2/s.

At 270°C: m2/s.

Schmidt number is

At 150°C .

At 180°C .

At 210°C .

At 240°C .

At 270°C .

Sherwood number is connected with Reynolds and Schmidt number through the following relation:

Table S6. Obtained values

| T,°C |  |  |
| --- | --- | --- |
| 150 | 2,38 | 2,46 |
| 180 | 2,37 | 2,44 |
| 210 | 2,36 | 2,43 |
| 240 | 2,35 | 2,42 |
| 270 | 2,34 | 2,40 |

Calculating mass transfer coefficients, we get

At 150°C: m/s and m/s

At 180°C: m/s and m/s

At 210°C: m/s and m/s

At 240°C: m/s and m/s

At 270°C: m/s and m/s

for the ZA-1 and ZA-2, respectively.

External surface area of the catalyst particles is defined by:

Where *m* is the catalyst mass, kg.

For the ZA-1, m2.

For ZA-2, m2.

Consider the methanol mole fraction in the gas phase equal to 36%. The methanol concentration at the outer catalyst surface is mol/m3.

Observed reaction rates are shown at the table below.

Table S7. Observed reaction rates at different temperatures

| T,°C | , | , |
| --- | --- | --- |
| 150 |  |  |
| 180 |  |  |
| 210 |  |  |
| 240 |  |  |
| 270 |  |  |

Thereafter, Carberry numbers are as follows:

For the ZA-1

at 150°C:

at 180°C:

at 210°C:

at 240°C:

at 270°C:

For the ZA-2

at 150°C

at 180°C

at 210°C

at 240°C

at 270°C

External diffusion limitations are present if Ca > 0.05, therefore both samples are free of external diffusion at conditions of the experiment.

Internal diffusion limitations

**Weisz-Prater criterion** (*NWP*) is utilized to evaluate the effect of the internal diffusion limitations. This criterion is given by:

Where *rV* – observed reaction rate per volume of the catalyst, mol/(m3×s). The diffusion coefficient *Dk* is used in Knudsen sense (worst case scenario). Knudsen diffusivity is defined by:

Where *dpore* is the mean pore diameter.

According to the isotherm data, the mean pore diameters are 1,1×10-8 m and 7,9×10-9 m for the ZA-1 and ZA-2 samples, respectively.

For the ZA-1, m2/s.

For the ZA-2, m2/s.

Table S8. Calculated values

| T,°C | , m2/s | , m2/s |
| --- | --- | --- |
| 150 | 1,96 | 1,40 |
| 180 | 2,07 | 1,44 |
| 210 | 2,14 | 1,49 |
| 240 | 2,21 | 1,54 |
| 270 | 2,27 | 1,58 |

The reaction rate per volume of the catalyst is given by:

The Weisz-Prater criteria are as follows.

For the ZA-1:

At 150°C .

At 180°C .

At 210°C .

At 240°C .

At 270°C .

For ZA-2:

At 150°C

At 180°C

At 210°C

At 240°C .

At 270°C .

As shown in [3] appreciable diffusion limitations are absent if following condition holds:

Where

- effectiveness factor. System is considered to be free of diffusion limitations if , here we consider an extreme case of .

n – reaction order.

Numerical values are 0,84 and 0,66 for ZA-1 and ZA-2 respectively. Therefore, ZA-1 is not subjected to internal diffusion limitations, and ZA-2 is only subjected at 270°C.

External heat transfer

Presence of a temperature gradient at a solid-gas phase boundary can be predicted by calculating a dimensionless criterion introduced by Mears [4]:

or

Where:

is heat of the reaction in J·mol-1,

– apparent activation energy of the reaction in J·mol-1

– the gas to particle heat transfer coefficient in W·m-2·K-1

could be obtained from the Chilton-Colburn equation [5]:

, where

– heat transfer factor, dimensionless

G – superficial mass velocity (kg∙m-2∙s-1)

Pr – the Prandtl number, dimensionless

Interphase temperature gradient is considered to be absent if:

According to [6]:

Where is Colburn factor, which, at low Reynolds numbers is given by an equation:

, where u is superficial gas velocity (m∙s-1)

Prandtl number is defined as:

, where – heat capacity of the gas phase at constant pressure, :

is the thermal conductivity of the gas phase, . is given by a following expression [7]:

= 1,45044;

= 0,63465;

Where is the boiling temperature of the component, K

At T = 543 K:

For ZA-1:

Table S9. Calculated values

| T,°C |  |  |
| --- | --- | --- |
| 150 | 42 | 38 |
| 180 | 188 | 98 |
| 210 | 285 | 249 |
| 240 | 209 | 181 |
| 270 | 74 | 72 |

Internal heat transfer

Criterion for isothermicity of the catalyst particle was derived by Anderson [8] from Damköhler’s dimensionless groups:

Catalyst particle is deemed isothermal if:

Where is effective thermal conductivity of the catalyst particle, W/(m*K). of an isotropic composite solid with high component/matrix volume ratios is given by a Rayleigh’s formula [9]:

Higher order terms in the denominator are ignored.

# is the thermal conductivity of the matrix (ZSM-5) [10]. is thermal conductivity of alumina oxide, which can be expressed as a polynomial [11]:

#

# is the volume fraction of the component.

# Table S10. Calculated values

| T,°C |  |  |
| --- | --- | --- |
| 150 | 0,00018 | 0,00016 |
| 180 | 0,00091 | 0,00047 |
| 210 | 0,00187 | 0,00164 |
| 240 | 0,00250 | 0,00213 |
| 270 | 0,00230 | 0,00217 |

# Although our calculations point out that temperature gradients exist at interphase between the bulk gas the particle, it provides no quantitive information on temperature differences between phases.

# Let’s consider an extreme case: all the heat, produced by a studied reaction is converted to the thermal energy of the catalyst:

# Where Q is the total amount of heat, produced by a reaction, J

# is heat capacity of the catalyst,

# N is the amount of product obtained by the end of a reaction, mol

# m is the catalyst mass, kg

# t – duration of the process, s

# Where is the specific heat capacity of the component,

# is the mass of the component, kg

# Specific heat capacities of the components where obtained via extrapolation of the data presented in [12].

# In the worst case scenario (T = 543 K) calculations give .In calculation of the activation energy it produces an error:

# As shown by our calculations, only changes in a 4th digit when temperature is changed for 20 degrees, so is approximately zero.

# Therefore, we can, with a high degree of accuracy, consider reactor to be isothermal.

References

[1]: J. R. Andrews, O. Biblarz, Temperature dependence of gas properties in polynomial form, *Naval Postgraduate School*, 1981

[2]: Klemm, E., Kstner, M., & Emig, G. (n.d.). Transport Phenomena and Reaction in Porous Media. *Handbook of Porous Solids*, 2174–2219. doi:10.1002/9783527618286.ch29

[3]: Weisz, P. B., Diffusivity of Porous Particles. *Zeitschrift Für Physikalische Chemie*, 11, 1–15

[4]: Mears, D. E. (1971). Tests for Transport Limitations in Experimental Catalytic Reactors. *Industrial & Engineering Chemistry Process Design and Development*, 10(4), 541–547. doi:10.1021/i260040a020

[5]: T. H. Chilton, A. P. Colburn, Mass transfer (absorption) coefficients prediction from data on heat transfer and fluid friction, *Industrial & Engineering Chemistry* 26 (11) (1934) 1183–1187. <http://dx.doi.org/10.1021/ie50299a012>

[6]: A. S. Gupta, G. Thodos, Mass and heat transfer in the flow of fluids through fixed and fluidized beds of spherical particles, *AI. Ch. E. Journal* 8 (5) (1962) 608–610. <http://dx.doi.org/10.1002/aic.690080509>

[7]: Lindsay, A. L., & Bromley, L. A. (1950). Thermal Conductivity of Gas Mixtures. *Industrial & Engineering Chemistry*, 42(8), 1508–1511. doi:10.1021/ie50488a017

[8]: J. Anderson, A criterion for isothermal behaviour of a catalyst pellet, *Chemical Engineering Science* 18 (2) (1963) 147–148, shorter communications

[9]: J. W. Strutt (Lord Rayleigh), On the influence of obstacles arranged in rectangular order upon the properties of a medium, *Phil. Mag.* (5), 34,431-502 (1892), <https://doi.org/10.1080/14786449208620364>

[10]:Fang, J., Huang, Y., Lew, C. M., Yan, Y., & Pilon, L. (2012). Temperature dependent thermal conductivity of pure silica MEL and MFI zeolite thin films. *Journal of Applied Physics*, 111(5), 054910. doi:10.1063/1.3692754

[11]: Morrell, r. 1985, Handbook of properties of technical & engineering ceramics. Part 2. *Data Reviews*, Section I, High-alumina ceramics, London, Her Majesty's Stationery Office, 255p.

[12]: Xiaojia Lu, Yanjun Wang, Lionel Estel, Narendra Kumar, Henrik Grénman 2, and Sébastien Leveneur, Evolution of Specific Heat Capacity with Temperature for Typical Supports Used for Heterogeneous Catalysts, *Processes* 2020, 8, 911; doi:10.3390/pr8080911
